# Supplementary material for: Annual forest maps in the contiguous United States during 2015–2017 from analyses of PALSAR-2 and Landsat images
Source: Copernicus journal article supplement (doi:10.5194/essd-2022-339), 2023-02-09

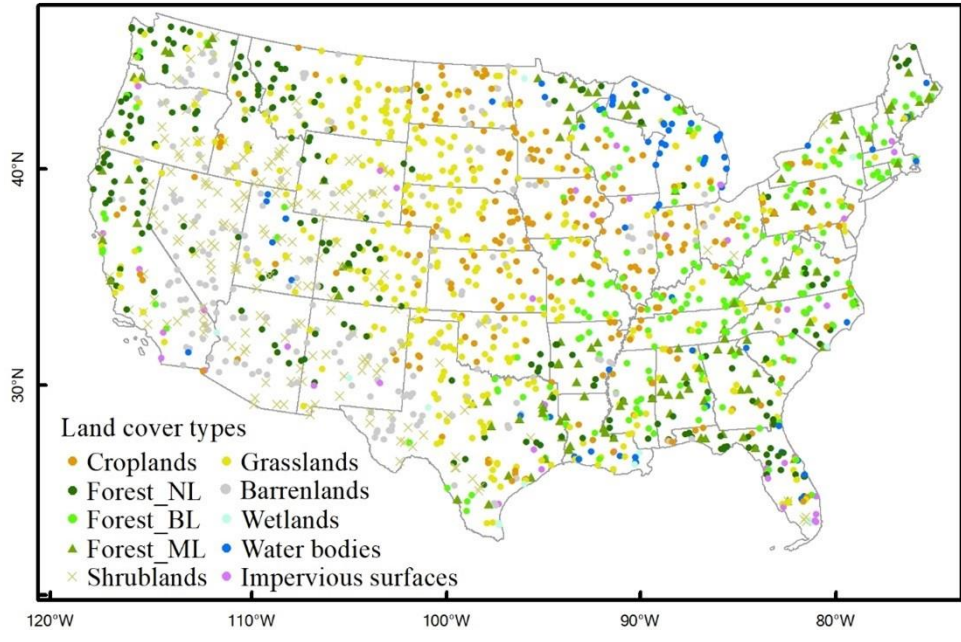

Supplement: Supplementary file [file essd-2022-339-AC3-supplement.pdf]
